# Supplementary material
Source: PubMed Central journal article supplement (PMC6632120)
Supplement: jamainternmed-179-1193-s001.pdf [file jamainternmed-179-1193-s001.pdf]

## Supplementary Online Content

Gomajee R, El-Khoury F, Goldberg M, et al. Association between electronic cigarette use and smoking reduction in France. *JAMA Intern Med*. Published online July 15, 2019. doi:10.1001/jamainternmed.2019.1483

**eFigure.** Flow Chart of CONSTANCES's Cohort Study Participants Included in the Analysis (2012-2017)

**eTable 1.** Smoking Cessation Among Smokers as a Function of EC Duration of Use, Poisson Regression with Robust Variance: CONSTANCES Cohort Study, 2012-2017, N = 5400 (Relative Risk, 95% CI)

**eTable 2.** Smoking Cessation in Relation to Patterns of Electronic Cigarette (EC) Use and Individuals' Characteristics, Poisson Regression With Robust Variance: CONSTANCES Cohort Study, 2012-2017, N = 5400 (Relative Risk, 95% CI)

This supplementary material has been provided by the authors to give readers additional information about their work.

**eFigure.** Flow Chart of CONSTANCES's Cohort Study Participants Included in the Analysis (2012-2017)

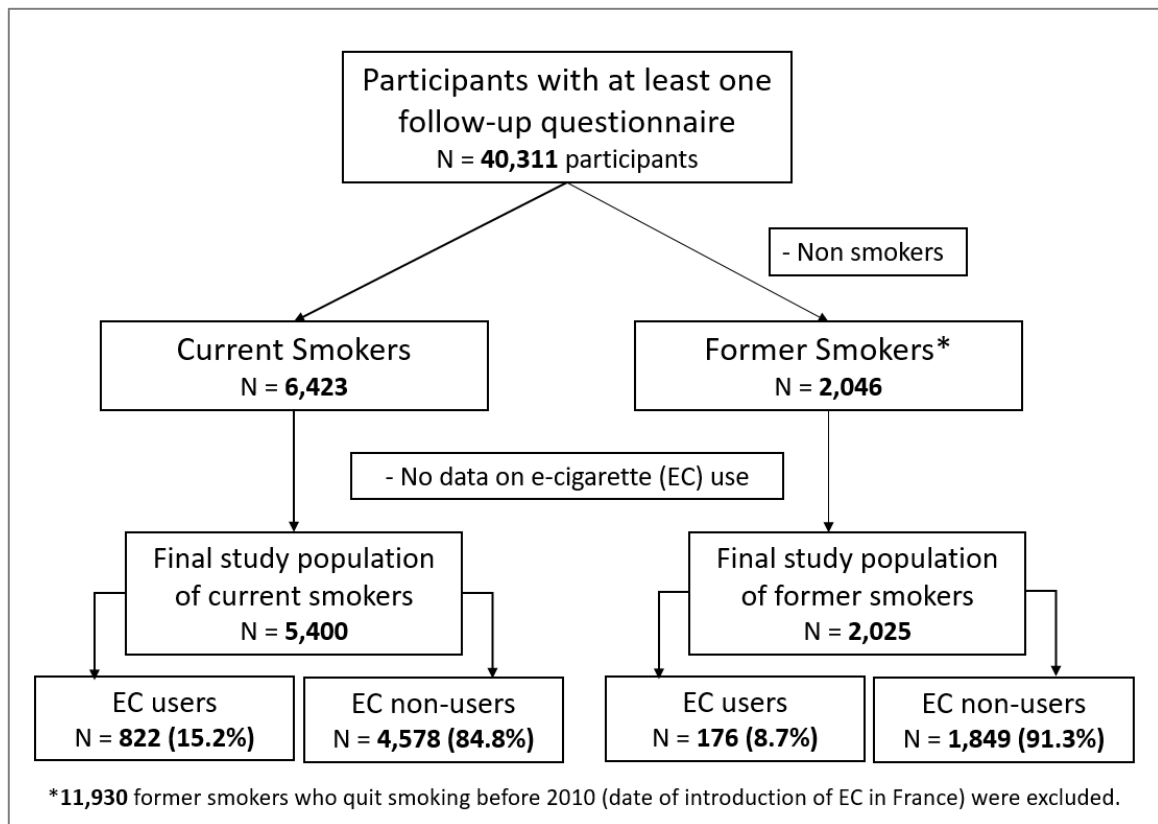

**eTable 1.** Smoking Cessation Among Smokers as a Function of EC Duration of Use, Poisson Regression with Robust Variance: CONSTANCES Cohort Study, 2012-2017, N = 5400 (Relative Risk, 95% CI)

| EC use duration              | <i>Non-users</i> | <i>EC use &lt; one year</i> |             | <i>EC use &gt;= one year</i> |             |
|------------------------------|------------------|-----------------------------|-------------|------------------------------|-------------|
| RR of smoking cessation      |                  | RR                          | 95% CI      | RR                           | 95% CI      |
| <i>Univariate analysis</i>   | reference        | <b>1.28***</b>              | 1.10 - 1.48 | <b>1.94***</b>               | 1.74 - 2.17 |
| <i>Multivariate analysis</i> | reference        | <b>1.33***</b>              | 1.15 - 1.54 | <b>2.03***</b>               | 1.82 - 2.27 |

\*\*\*:  $P < 0.001$

Adjusted on: age, sex, educational level, income, financial difficulties, marital status, cigarettes packet years, number of cigarettes smoked at inclusion, cigarette pack-years, duration of previous quit attempts, history of depression and depression at baseline, and respiratory problems.

**eTable 2.** Smoking Cessation in Relation to Patterns of Electronic Cigarette (EC) Use and Individuals' Characteristics, Poisson Regression With Robust Variance: CONSTANCES Cohort Study, 2012-2017, N = 5400 (Relative Risk, 95% CI)

| Stratification by:                         | N (%)                | RR          | 95% CI    | N (%)                 | RR          | 95% CI    | N (%)               | RR          | 95% CI    | Interaction (P) |
|--------------------------------------------|----------------------|-------------|-----------|-----------------------|-------------|-----------|---------------------|-------------|-----------|-----------------|
| <b>Gender</b>                              | <i>Male</i>          |             |           | <i>Female</i>         |             |           |                     |             |           | <b>0.218</b>    |
| <i>Non-users</i>                           | 2072 (83.0)          | reference   |           | 2508 (86.3)           | reference   |           |                     |             |           |                 |
| <i>EC use &lt; 1 year</i>                  | 199 (8.0)            | <b>1.39</b> | 1.14-1.70 | 226 (7.8)             | <b>1.28</b> | 1.03-1.58 |                     |             |           |                 |
| <i>EC use ≥ 1 year</i>                     | 223 (9.0)            | <b>1.86</b> | 1.58-2.18 | 172 (5.9)             | <b>2.32</b> | 1.97-2.74 |                     |             |           |                 |
| <b>Age</b>                                 | <i>18-35 years</i>   |             |           | <i>36-50 years</i>    |             |           | <i>&gt;50 years</i> |             |           | <b>0.383</b>    |
| <i>Non-users</i>                           | 1218 (87.0)          | reference   |           | 1754 (84.6)           | reference   |           | 1608 (83.5)         | reference   |           |                 |
| <i>EC use &lt; 1 year</i>                  | 106 (7.6)            | <b>1.31</b> | 0.99-1.74 | 163 (7.9)             | <b>1.46</b> | 1.16-1.82 | 156 (8.1)           | <b>1.26</b> | 0.96-1.64 |                 |
| <i>EC use ≥ 1 year</i>                     | 76 (5.4)             | <b>1.76</b> | 1.38-2.25 | 157 (7.6)             | <b>2.27</b> | 1.94-2.70 | 162 (8.4)           | <b>2.01</b> | 1.64-2.46 |                 |
| <b>Duration of prior smoking cessation</b> | <i>Never</i>         |             |           | <i>&lt; 1 year</i>    |             |           | <i>≥ 1 year</i>     |             |           | <b>0.130</b>    |
| <i>Non-users</i>                           | 1431 (86.3)          | reference   |           | 1416 (83.4)           | reference   |           | 1733 (84.8)         | reference   |           |                 |
| <i>EC use &lt; 1 year</i>                  | 124 (7.5)            | <b>1.42</b> | 1.03-1.95 | 147 (8.7)             | <b>1.46</b> | 1.13-1.90 | 54 (7.6)            | <b>1.17</b> | 0.96-1.44 |                 |
| <i>EC use ≥ 1 year</i>                     | 104 (6.3)            | <b>2.52</b> | 1.99-3.22 | 135(8.0)              | <b>2.15</b> | 1.75-2.65 | 156 (7.6)           | <b>1.80</b> | 1.53-2.13 |                 |
| <b>Education level<sup>a</sup></b>         | <i>Low education</i> |             |           | <i>High education</i> |             |           |                     |             |           | <b>0.461</b>    |
| <i>Non-users</i>                           | 2096 (84.7)          | reference   |           | 2483 (84.9)           | reference   |           |                     |             |           |                 |
| <i>EC use &lt; 1 year</i>                  | 205 (8.3)            | <b>1.21</b> | 0.93-1.56 | 220 (7.5)             | <b>1.41</b> | 1.19-1.68 |                     |             |           |                 |
| <i>EC use ≥ 1 year</i>                     | 172 (7.0)            | <b>2.00</b> | 1.66-2.43 | 223 (7.6)             | <b>2.06</b> | 1.79-2.37 |                     |             |           |                 |

**Adjusted on:** age, gender, educational level, income, financial difficulties, marital status, number of cigarettes smoked at inclusion, cigarette pack-years, duration of previous quit attempts, history of depression and depression at baseline, and respiratory problems

<sup>a</sup> **Educational level:** ≤ high school vs. higher education
